# Supplementary material
Source: PubMed Central journal article supplement (PMC4226127)
Supplement: pnas.1404656111.sapp.pdf [file pnas.1404656111.sapp.pdf]

## Supplemental Information

### Single-cell analyses of transcriptional heterogeneity during drug tolerance transition in cancer cells by RNA sequencing

Mei-Chong Wendy Lee <sup>1,\*</sup>, Fernando J. Lopez-Diaz <sup>2,\*</sup>, Shahid Y. Khan <sup>1</sup>, Muhammad A. Tariq <sup>1</sup>, Yelena Dayn <sup>3</sup>, Charlie Vaske <sup>4</sup>, Amie J. Radenbaugh <sup>1</sup>, Hyunsung J. Kim <sup>1</sup>, Beverly M. Emerson <sup>2,†</sup>, and Nader Pourmand<sup>1,‡</sup>

<sup>1</sup> Biomolecular Engineering Department, University of California Santa Cruz, 1156 High Street, Santa Cruz, CA 95064, USA, <sup>2</sup> Laboratory of Regulatory Biology, The Salk Institute for Biological Studies, 10010 North Torrey Pines Road, La Jolla, CA 92037, USA, <sup>3</sup> Transgenic Core Laboratory, The Salk Institute for Biological Studies, 10010 North Torrey Pines Road, La Jolla, CA 92037, USA, and <sup>4</sup> Five3 Genomics, LLC, 101 Cooper St, Santa Cruz, CA 95060, USA

#### Author Footnotes

\* These authors contributed equally to this work

‡ To whom correspondence should be addressed:

Nader Pourmand, Ph.D.

Biomolecular Engineering Department, University of California Santa Cruz

1156 High Street, Santa Cruz, 95064

Tel: +1-831-502-7315, Fax: +1-831-459-2891

email: [pourmand@stanford.edu](mailto:pourmand@stanford.edu)

† To whom correspondence should be addressed:

Beverly M. Emerson, Ph.D.

The Salk Institute for Biological Studies

10010 North Torrey Pines Road La Jolla, CA 92037

Tel: +1-[858-453-4100](tel:+18584534100), x1368, Fax: +1-[858-535-8194](tel:+18585358194)

email: [emerson@salk.edu](mailto:emerson@salk.edu)

**Figure S1. The number of SNVs detected in single cells and population regions cells at various depth of read coverage. Related to Figure 2.** The number of SNVs was normalized by the number of genomic bases with the corresponding depth of read coverage to ensure that the difference in the number of SNVs was not due to the difference in the breadth of genome coverage.

**Figure S2. Number of bases with reads at various depth of coverage. Related to Figure 2.**

The number of bases with reads in different genomic regions presenting low to high depth of sequencing was plotted to detect biases in coverage/depth of sequencing between single cells vs. cell population RNA-Seq data.

**Figure S3: The fraction of novel variants shared between any two single cells. Related to Figure 2.** A high heterogeneity is observed between single cells within and between groups. UNT: untreated cells, S: stressed cells, DT: drug-tolerant cells.

**Figure S4. Hierarchical clustering of the top 50 most differentially expressed genes. Related to Figure 4.**

(A) Hierarchical clustering of the 50 most significant differential expressed genes between stressed- and drug-tolerant cells ( $p$ -value < 0.001, FDR < 0.025). (B) Hierarchical clustering of the 50 most significant differential expressed genes between untreated- and drug-tolerant cells ( $p$ -value < 0.001, FDR < 0.025).

**Figure S5. Hierarchical clustering of gene expression data. Related to Figure 4**

(A) Hierarchical clustering of gene expression data for single-cells in Euclidean distance with 1,000 bootstrap replications. Values at branches are approximately unbiased (AU)  $p$ -values (left), bootstrap probability (BP) values (right), and single-cell labels (bottom). (B) The clustering gene expression data in adjusted-RPKM using principal component analysis (PCA) showed that gene expression profiles of stressed cells (red) were much different from those of untreated (green) and drug-tolerant cells (black). UNT\_1-5: untreated single cells, UNT\_POP: untreated population cells, UNT\_Pooled: untreated 5-cell pooled sample. S: stressed: DT: drug-tolerant.

**Figure S6. Single cell gene expression is not reflected from averaged expression. Related to Figure 4.** (A) Scatter plots of averaged gene expression for pair-wise comparison between 5 single cells in untreated, stressed and drug-tolerant cell groups. (B) Scatter plots of gene expression between monoclonal (<6 cell divisions apart) drug-tolerant single cells. Comparison between two drug-tolerant (DT) cells (left and right panel); One DT cell vs. four DT cells comparison (middle panel). (C) Scatter plots of gene expression between stressed cells and drug-tolerant cells. One-to-one comparison for stressed (S) cells (left panel); One S cell vs. four S cells (middle panel); One S cell vs four DT (right panel).

**Figure S7. Comparing single-cell SNV frequencies between cells from normal human cells and cancer cell line cells. Related to Figure 2.** The single-cell SNV frequencies are calculated by dividing the number of private novel SNVs in a single cell by the total number of novel SNVs in that cell. Private novel SNVs are unique SNVs only present in the single cell and not in any other single cell of the same type type. We utilized the single-cell RNA-Seq data from Yan et al., 2013 including three oocytes, one pair of 2-cell embryo cells, and two sets of four single cells from a 4-cell embryo. From Ramsköld et al., 2012 single-cell RNA-Seq dataset, we analyzed two sets of single cells from two different melanoma cancer cell lines (UACC257 and SKMEL5), and eight human embryonic stem cells.

**Figure S8. Hierarchical clustering of the expressed genes involved in cell-cycle, DNA-damage signaling, senescence, drug-resistance and metabolism, and apoptosis between untreated- (blue), stressed-arrested (red) and drug-tolerant cells (green). Related to figure 4.**

**Figure S9. Transcript abundance for genes that have an RNA variant in at least 3 of the drug-tolerant cells shown in Table 1. Related to Table 1.** Relative expression compared to the total RNA abundance was determined as adj-RPKM, as described. UNT: untreated, S: stressed, DT: drug-tolerant.

Figure S1, Lee & Lopez-Diaz et al

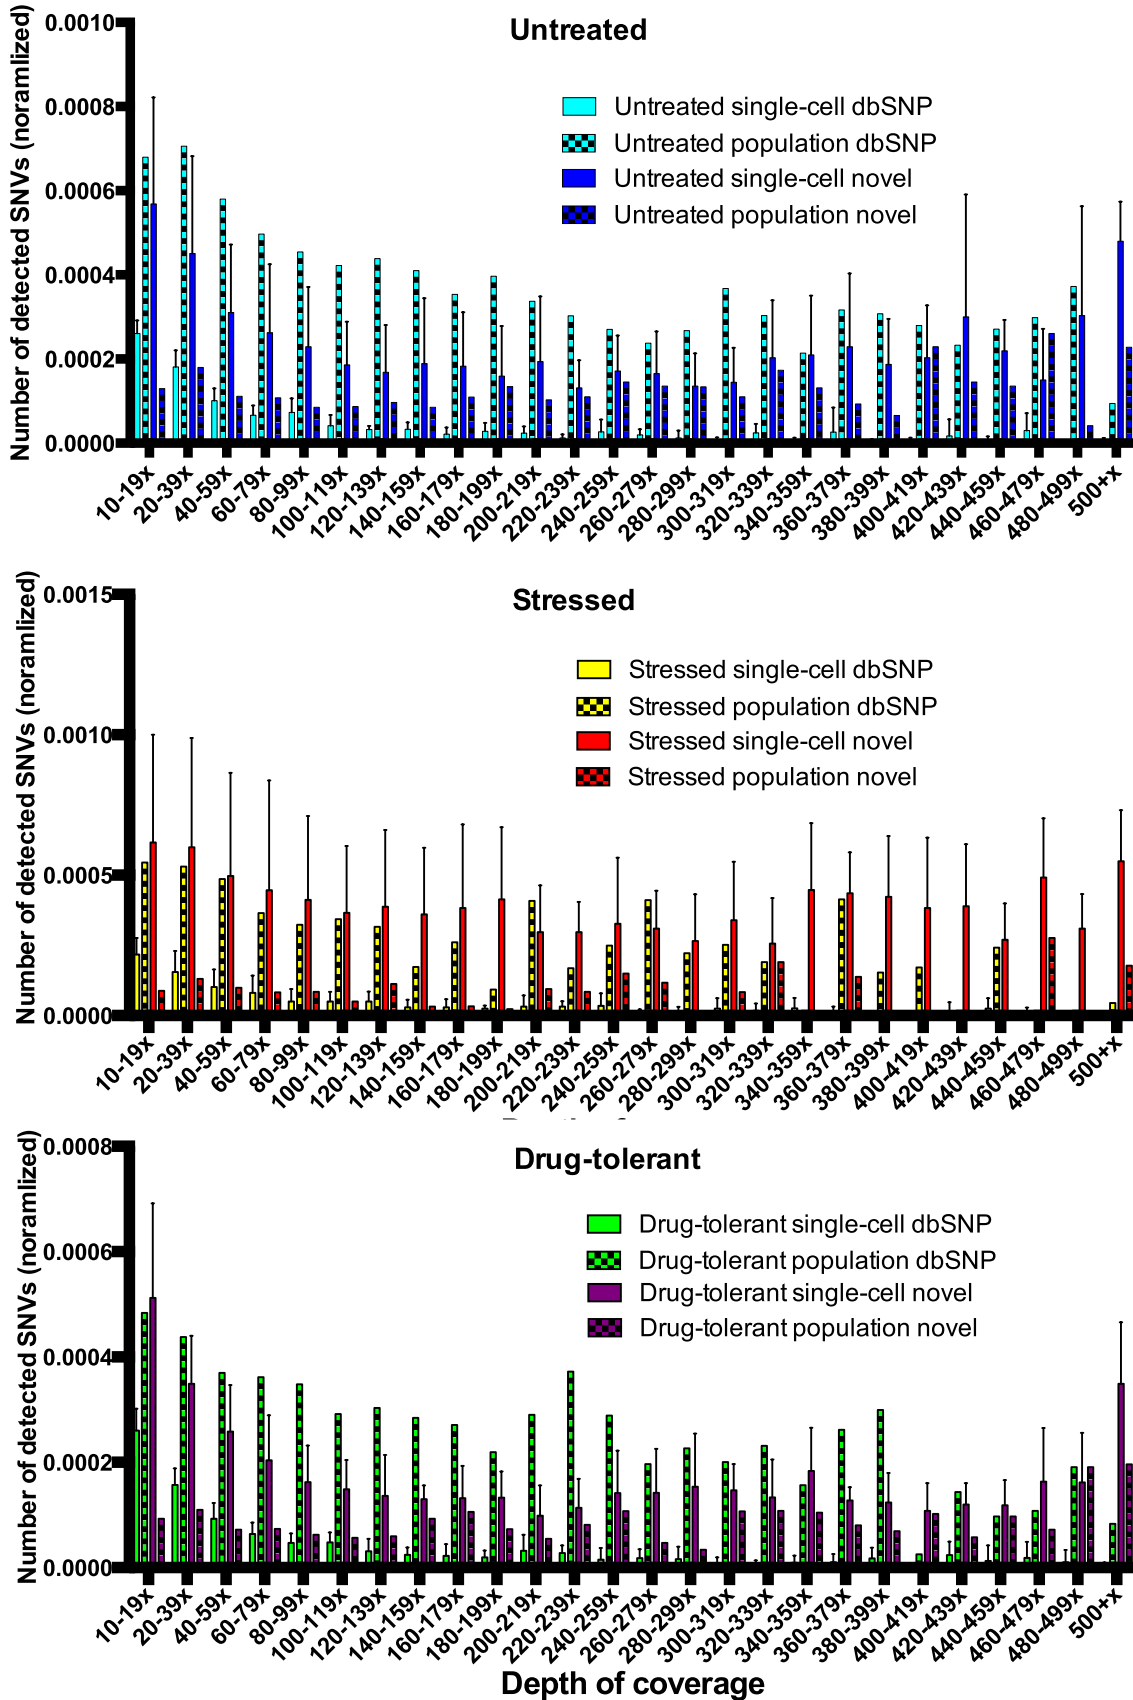

Figure S2, Lee & Lopez-Diaz et al

### Untreated

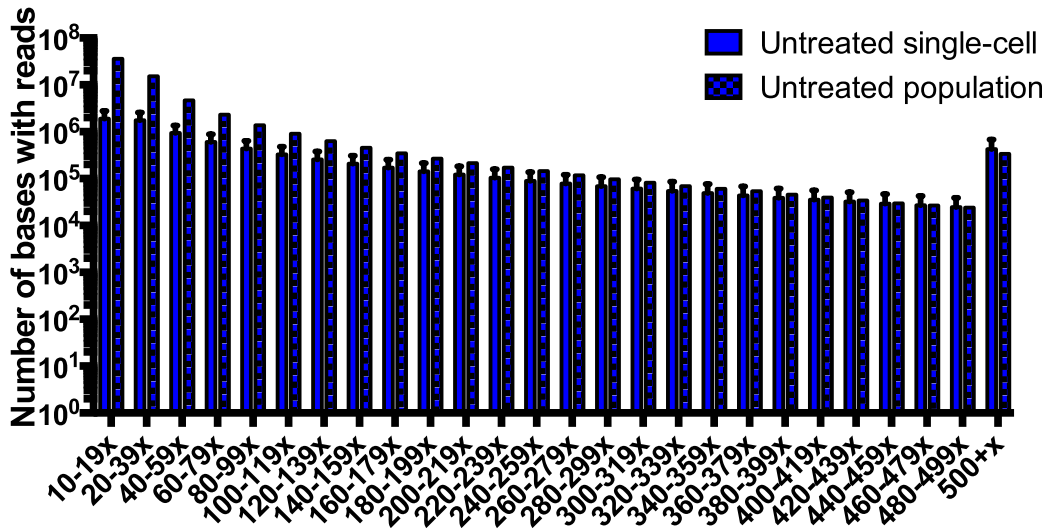

### Stressed

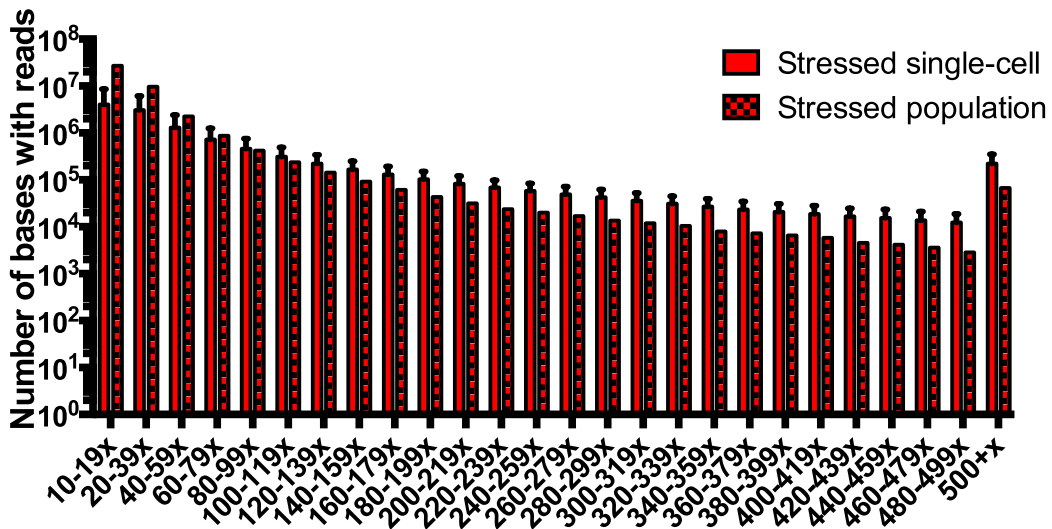

### Drug-tolerant

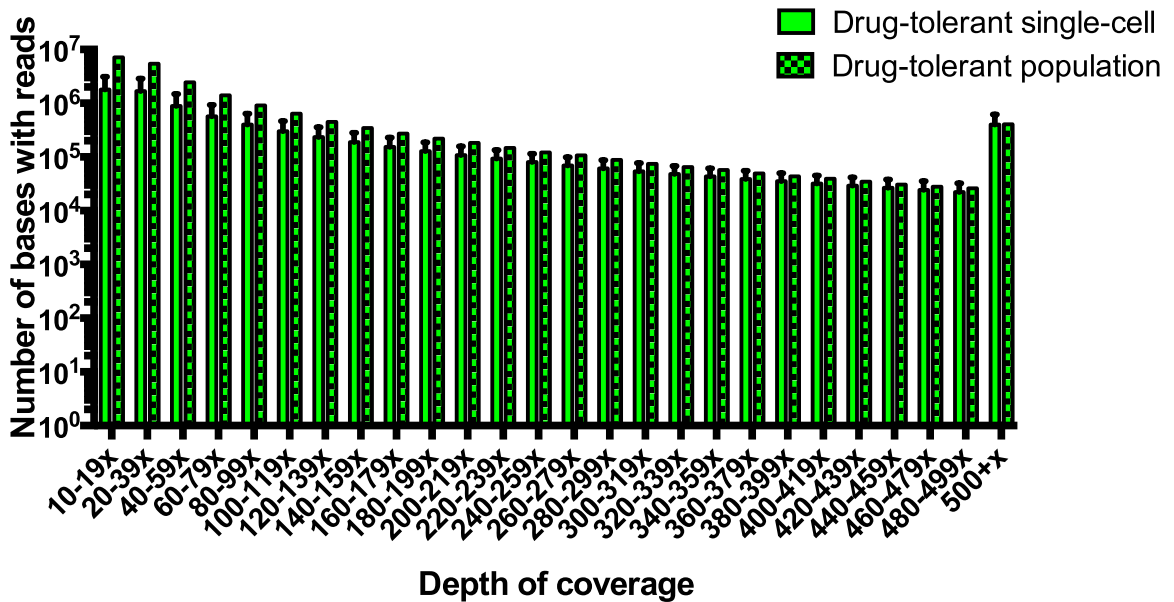

Depth of coverage

Figure S3, Lee & Lopez-Diaz et al

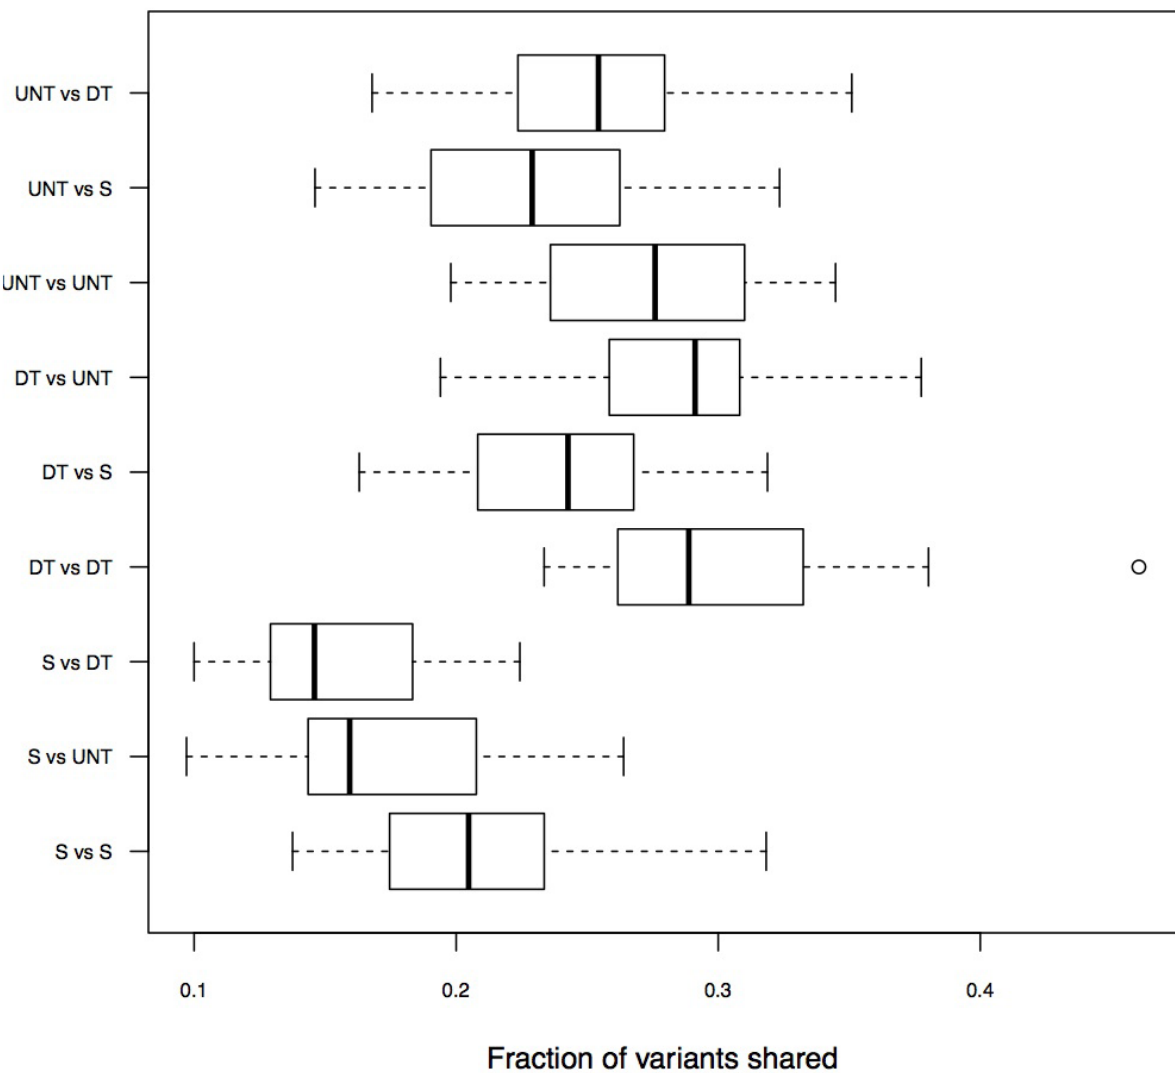

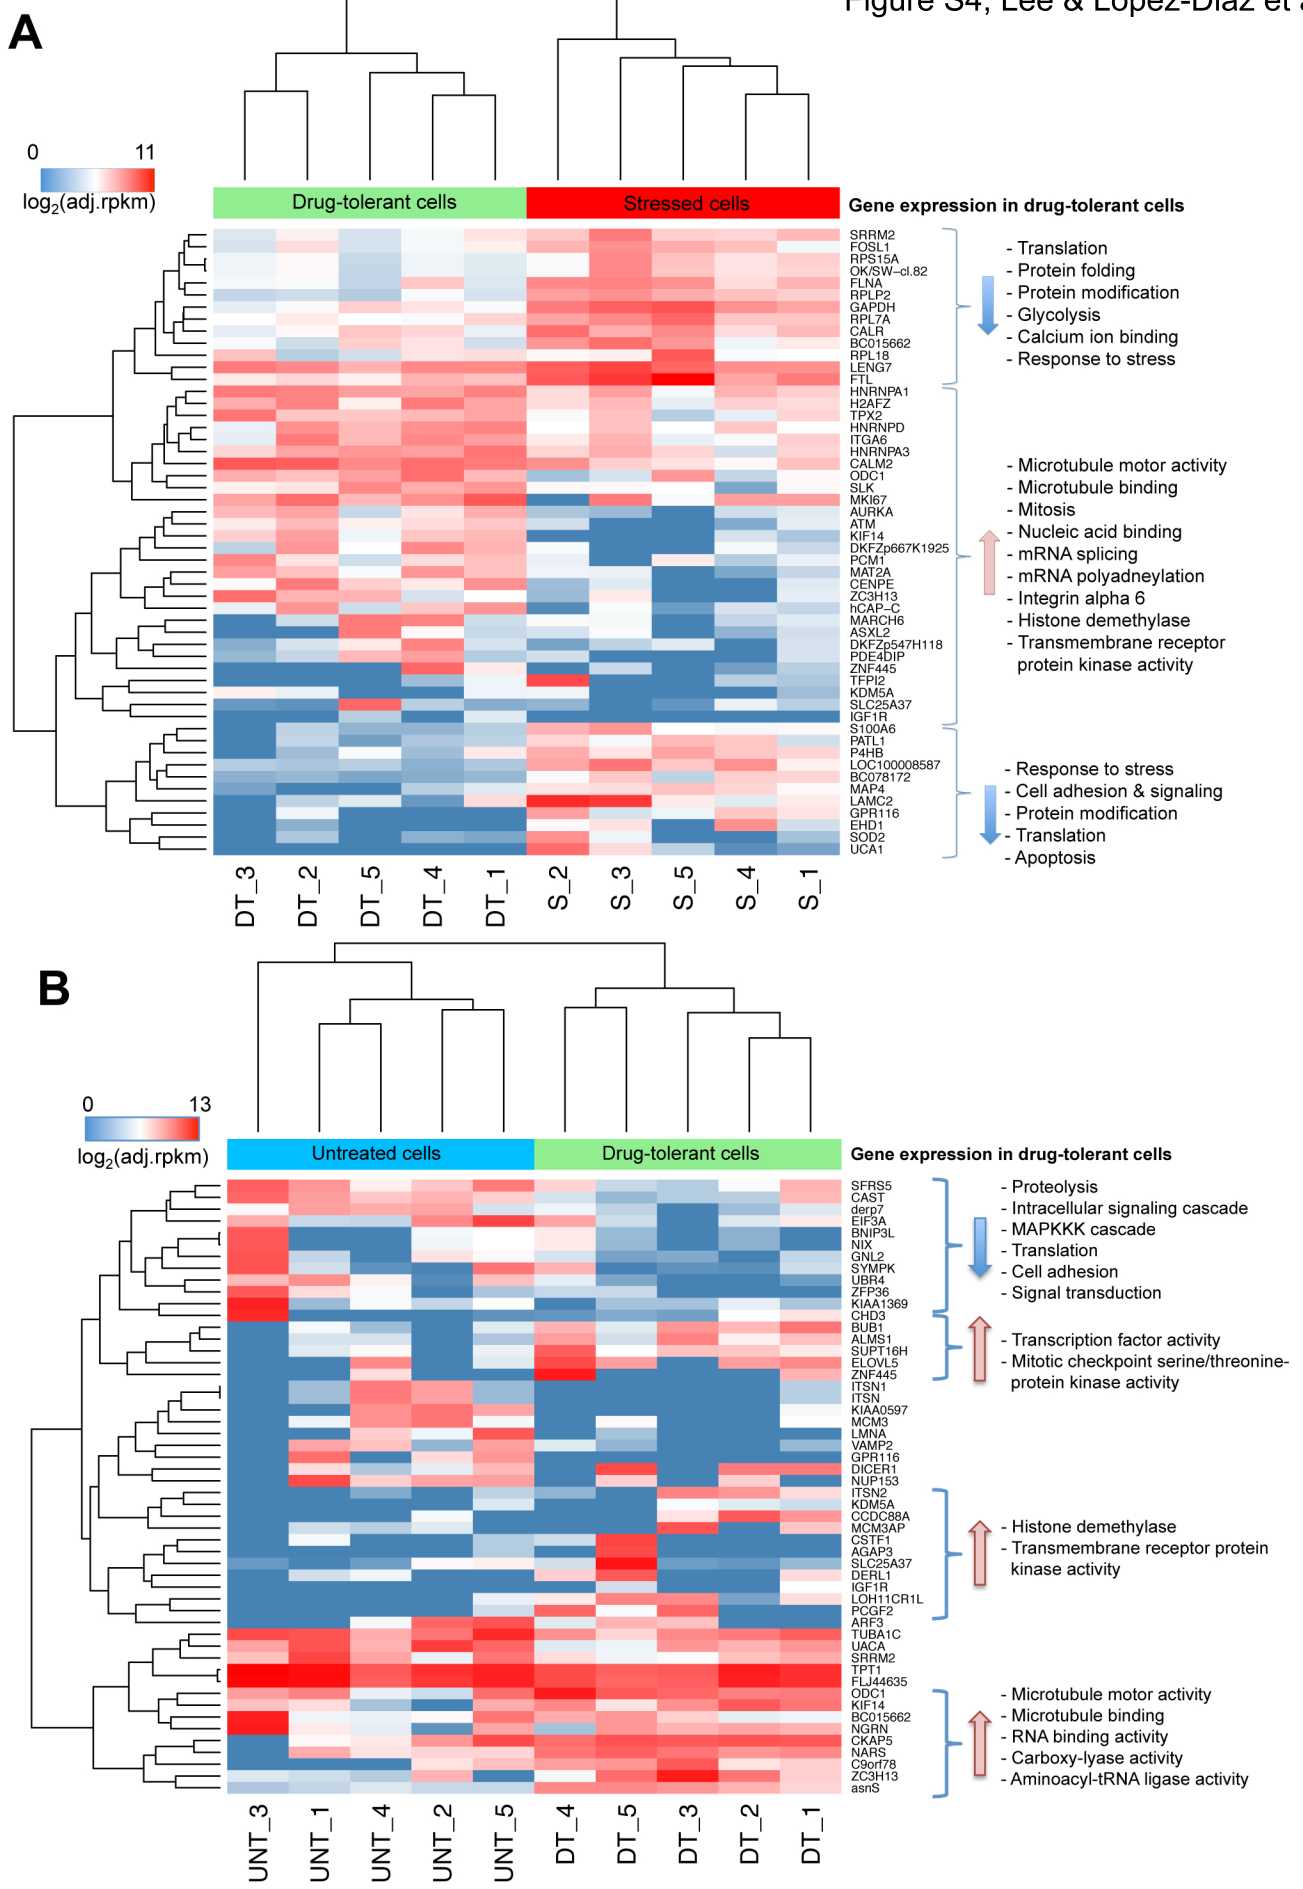

**A**

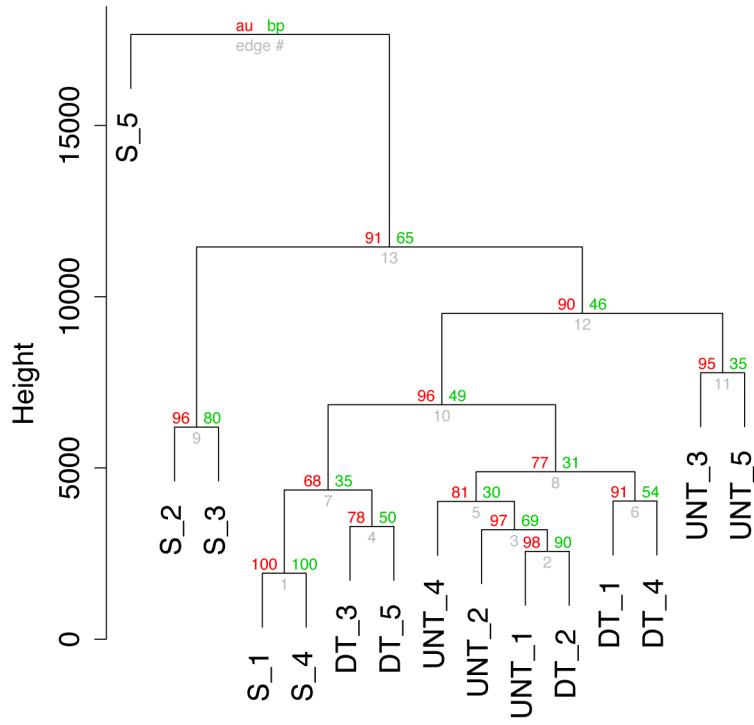

**B**

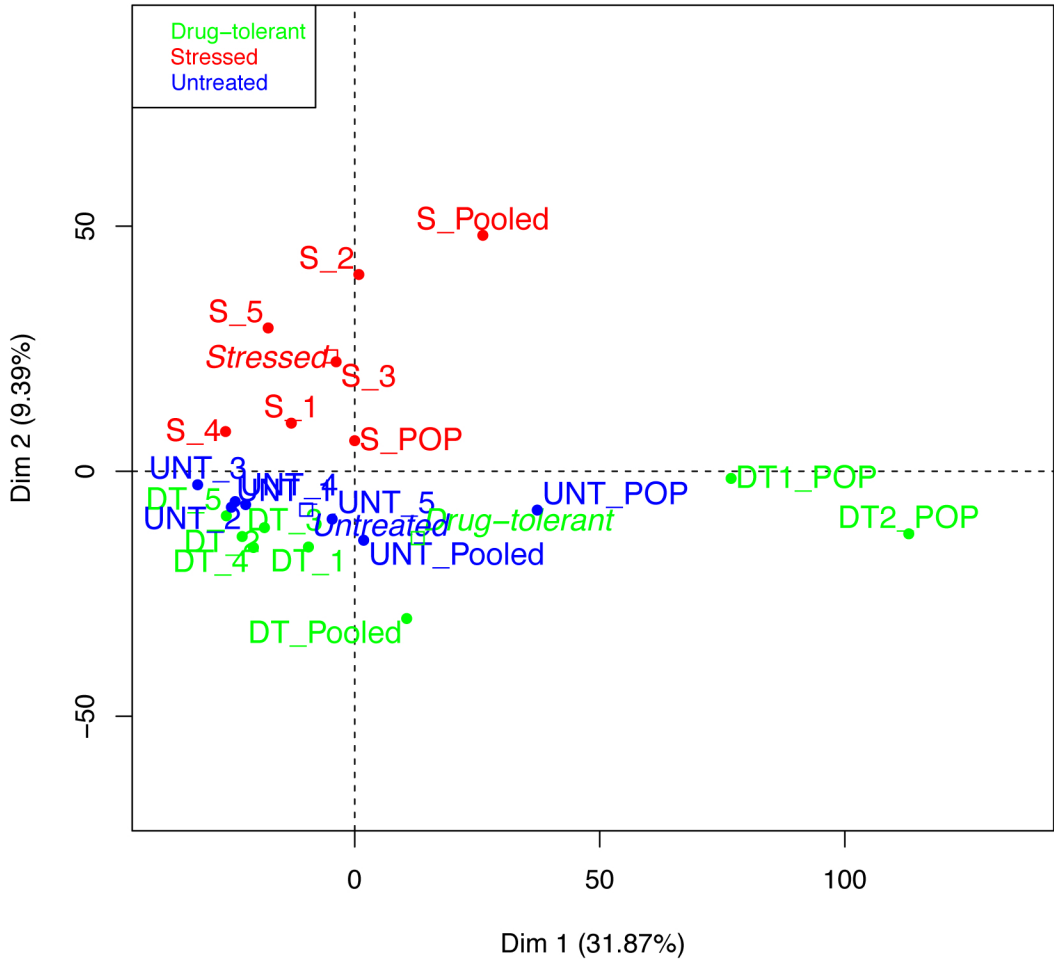



**A**

## Pooled Gene Expression

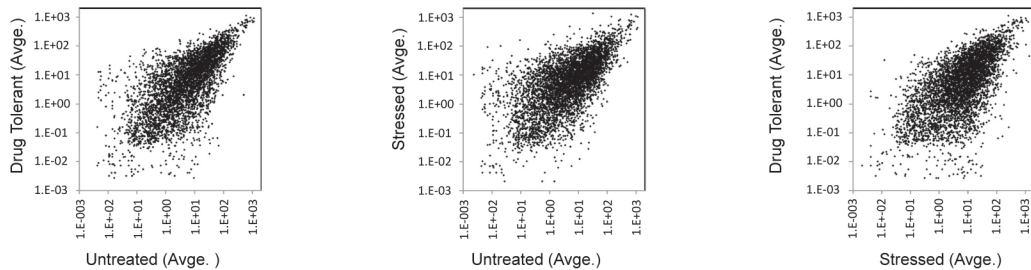**B**

## Drug-tolerant Single-cells Gene Expression

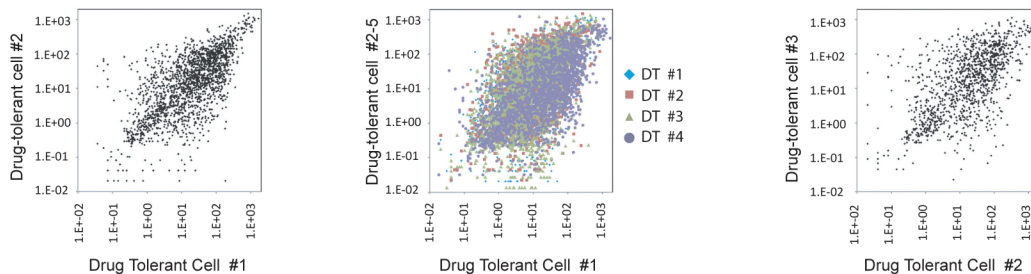**C**

## Stress Arrested Single-cells Gene Expression

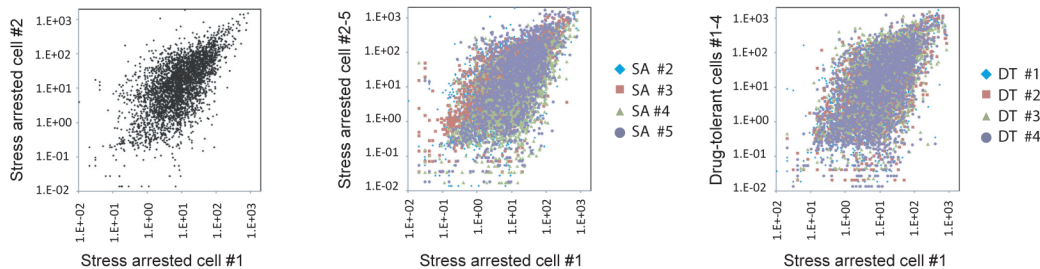

Yan et al., 2013

MDA-MB-231

Ramsköld et al., 2012

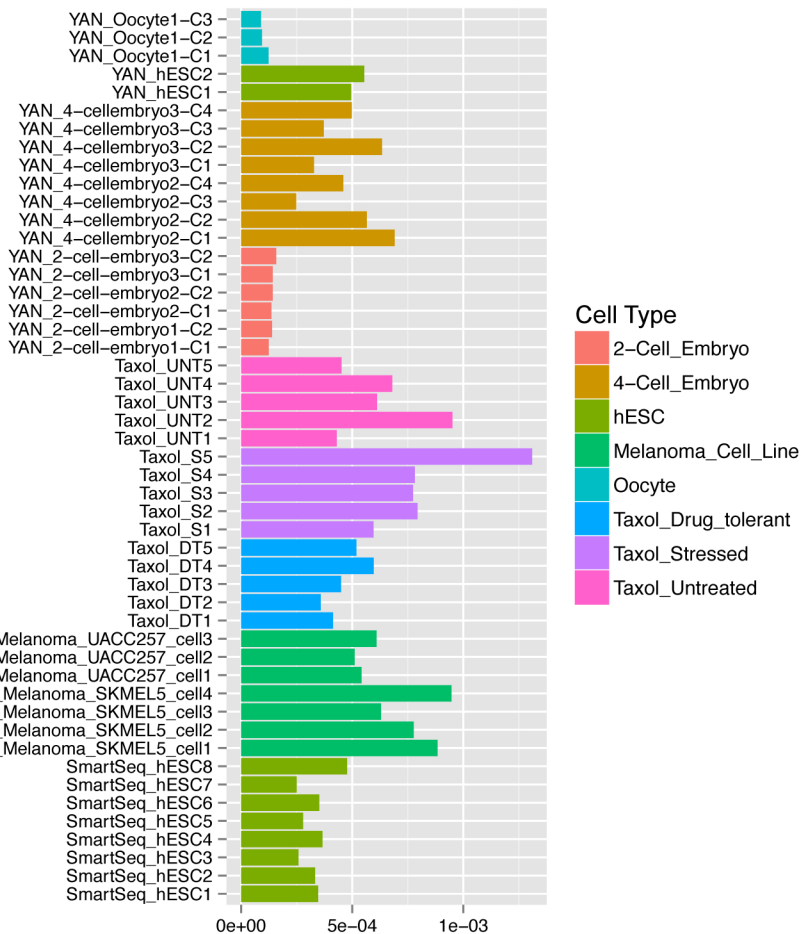

Figure S7, Lee &amp; Lopez-Diaz et al.



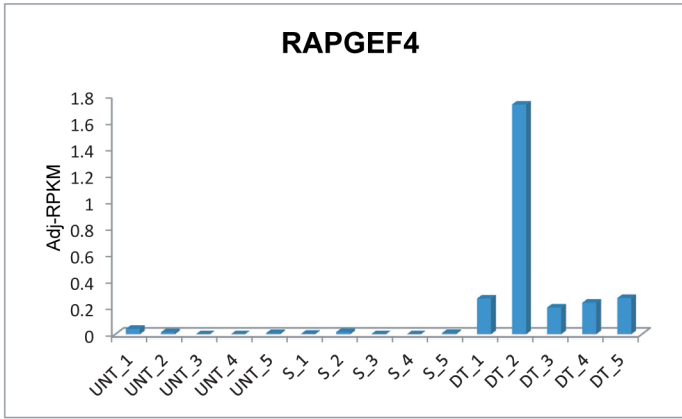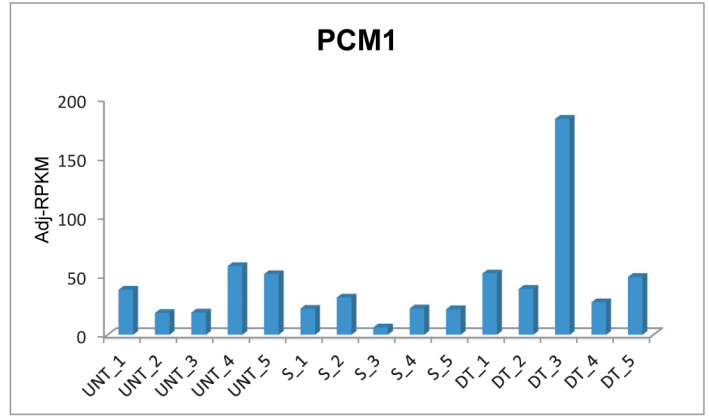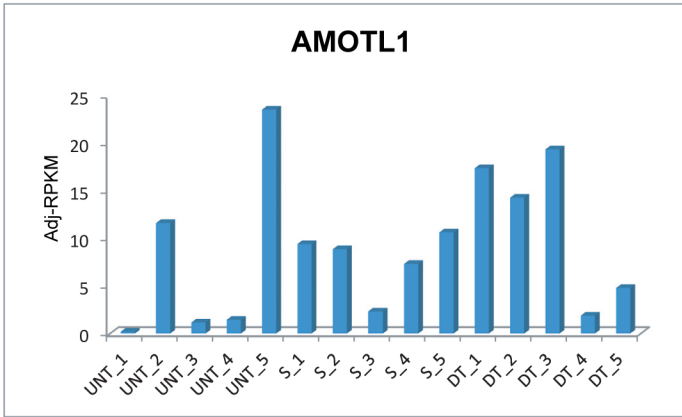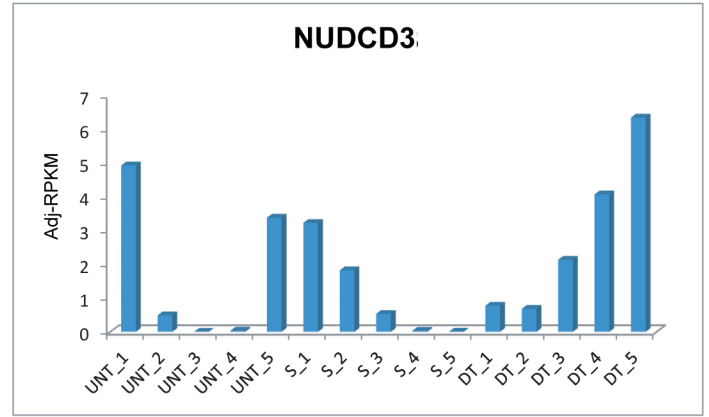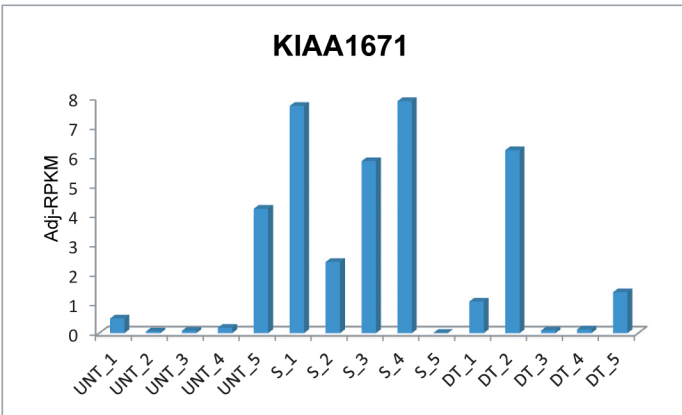

**Table S1. Number of sequencing reads and mapping statistics.**

| <b>Samples</b> | <b>Total number of paired-end reads sequenced</b> | <b>Total mapped reads without PCR duplicates, properly paired</b> |
|----------------|---------------------------------------------------|-------------------------------------------------------------------|
| UNT_1          | 72,398,342                                        | 42,429,918                                                        |
| UNT_2          | 97,896,104                                        | 69,651,740                                                        |
| UNT_3          | 32,434,019                                        | 25,731,672                                                        |
| UNT_4          | 86,764,133                                        | 62,280,876                                                        |
| UNT_5          | 55,056,490                                        | 22,804,666                                                        |
| UNT_Pop        | 94,393,218                                        | 80,834,490                                                        |
| S_1            | 93,752,892                                        | 89,363,318                                                        |
| S_2            | 77,374,749                                        | 59,347,478                                                        |
| S_3            | 57,117,251                                        | 27,832,072                                                        |
| S_4            | 76,309,928                                        | 56,447,554                                                        |
| S_5            | 63,019,868                                        | 46,954,348                                                        |
| S_Pop          | 89,785,654                                        | 73,548,017                                                        |
| DT_1           | 94,547,328                                        | 47,021,098                                                        |
| DT_2           | 86,555,396                                        | 46,399,478                                                        |
| DT_3           | 69,507,808                                        | 43,944,268                                                        |
| DT_4           | 86,185,154                                        | 66,641,812                                                        |
| DT_5           | 105,928,132                                       | 61,132,450                                                        |
| DT_Pop_1       | 110,801,220                                       | 85,512,326                                                        |
| DT_Pop_2       | 106,855,138                                       | 70,235,819                                                        |

**Table S2. RNA sequencing reads of the population cells cover more genomic region than that of single cells.**

|                     | <b>Samples</b> | <b>% Genomic coverage</b> |
|---------------------|----------------|---------------------------|
| <b>Single cells</b> | UNT_1          | 6.5%                      |
|                     | UNT_2          | 7.1%                      |
|                     | UNT_3          | 2.2%                      |
|                     | UNT_4          | 6.5%                      |
|                     | UNT_5          | 11.0%                     |
|                     | S_1            | 20.9%                     |
|                     | S_2            | 14.2%                     |
|                     | S_3            | 12.1%                     |
|                     | S_4            | 5.1%                      |
|                     | S_5            | 5.1%                      |
|                     | DT_1           | 9.9%                      |
|                     | DT_2           | 6.1%                      |
|                     | DT_3           | 3.9%                      |
|                     | DT_4           | 5.5%                      |
|                     | DT_5           | 5.8%                      |
| <b>Population</b>   | UNT_POP        | 49.5%                     |
|                     | S_POP          | 48.2%                     |
|                     | DT_POP_1       | 36.7%                     |
|                     | DT_POP_2       | 41.9%                     |

For each sample, the percent genomic coverage is calculated by dividing the total number of transcriptomic-bases with at least 1x read coverage by the total number of transcriptomic bases.

**Table S3. Number of genes with RPKM>1 and adjRPKM>1 in single cells and population cells**

| <b>Samples</b>    | <b>Number of genes with RPKM&gt;1</b> | <b>% detected genes compared to population</b> | <b>Number of genes with adj-RPKM&gt;1</b> | <b>% detected genes compared to population</b> |
|-------------------|---------------------------------------|------------------------------------------------|-------------------------------------------|------------------------------------------------|
| UNT_1             | 2484                                  | 20%                                            | 2212                                      | 17%                                            |
| UNT_2             | 2431                                  | 19%                                            | 2172                                      | 17%                                            |
| UNT_3             | 1266                                  | 10%                                            | 959                                       | 7%                                             |
| UNT_4             | 2288                                  | 18%                                            | 2040                                      | 16%                                            |
| UNT_5             | 3635                                  | 29%                                            | 3070                                      | 24%                                            |
| UNT_Pooled_5cells | 8175                                  | 65%                                            | 10146                                     | 79%                                            |
| UNT_Pop           | 12541                                 | -                                              | 12854                                     | -                                              |
| S_1               | 4442                                  | 32%                                            | 4565                                      | 38%                                            |
| S_2               | 3992                                  | 29%                                            | 3835                                      | 32%                                            |
| S_3               | 3869                                  | 28%                                            | 3383                                      | 28%                                            |
| S_4               | 2011                                  | 15%                                            | 1665                                      | 14%                                            |
| S_5               | 1909                                  | 14%                                            | 1644                                      | 14%                                            |
| S_Pooled_5cells   | 10209                                 | 74%                                            | 12855                                     | 107%                                           |
| S_Pop             | 13796                                 | -                                              | 12007                                     | -                                              |
| DT_1              | 3261                                  | 24%                                            | 2927                                      | 25%                                            |
| DT_2              | 2641                                  | 20%                                            | 2137                                      | 18%                                            |
| DT_3              | 2091                                  | 15%                                            | 1564                                      | 13%                                            |
| DT_4              | 2247                                  | 17%                                            | 1902                                      | 16%                                            |
| DT_5              | 2310                                  | 17%                                            | 1879                                      | 16%                                            |
| DT_Pooled_5cell   | 8175                                  | 60%                                            | 9760                                      | 82%                                            |
| DT_Pop_1          | 12443                                 | -                                              | 11981                                     | -                                              |
| DT_Pop_2          | 14609                                 | -                                              | 11795                                     | -                                              |

**Table S4. The number of common and unique SNVs detected in single cells and population in three different groups. Related to Figure 2.**

| Cell Type            | Cell ID | All SNVs in single cell passed all filters | All SNVs in population passed all filters | Comparable SNVs in single cell | Comparable SNVs in population | Novel SNVs only in single cell | Novel SNVs only in population | Novel SNVs in both single cell and population | dbSNP variants only in single cell | dbSNP variants only in population | dbSNP variants in both single cell and population |
|----------------------|---------|--------------------------------------------|-------------------------------------------|--------------------------------|-------------------------------|--------------------------------|-------------------------------|-----------------------------------------------|------------------------------------|-----------------------------------|---------------------------------------------------|
| <b>Untreated</b>     | 1       | 6284                                       | 63578                                     | 2109                           | 2411                          | 1356                           | 470                           | 760                                           | 28                                 | 93                                | 663                                               |
|                      | 2       | 8382                                       | 63578                                     | 3097                           | 2809                          | 2270                           | 516                           | 834                                           | 36                                 | 104                               | 715                                               |
|                      | 3       | 2267                                       | 63578                                     | 784                            | 451                           | 644                            | 107                           | 142                                           | 15                                 | 17                                | 116                                               |
|                      | 4       | 7595                                       | 63578                                     | 2257                           | 2155                          | 1602                           | 402                           | 658                                           | 35                                 | 108                               | 566                                               |
|                      | 5       | 4000                                       | 63578                                     | 2292                           | 2919                          | 1292                           | 545                           | 1003                                          | 33                                 | 144                               | 877                                               |
| <b>Stressed</b>      | 1       | 13756                                      | 35227                                     | 5278                           | 5439                          | 3211                           | 824                           | 2071                                          | 59                                 | 309                               | 1897                                              |
|                      | 2       | 8886                                       | 35227                                     | 4832                           | 2967                          | 3641                           | 392                           | 1196                                          | 34                                 | 127                               | 1086                                              |
|                      | 3       | 6152                                       | 35227                                     | 2902                           | 2000                          | 2217                           | 336                           | 687                                           | 23                                 | 142                               | 623                                               |
|                      | 4       | 4342                                       | 35227                                     | 1850                           | 1025                          | 1464                           | 152                           | 392                                           | 31                                 | 58                                | 351                                               |
|                      | 5       | 5748                                       | 35227                                     | 2873                           | 1021                          | 2442                           | 139                           | 435                                           | 30                                 | 42                                | 390                                               |
| <b>Drug-tolerant</b> | 1       | 8100                                       | 11857                                     | 2112                           | 1913                          | 1343                           | 363                           | 773                                           | 31                                 | 98                                | 683                                               |
|                      | 2       | 3684                                       | 11857                                     | 1280                           | 1248                          | 780                            | 251                           | 503                                           | 14                                 | 63                                | 442                                               |
|                      | 3       | 2688                                       | 11857                                     | 965                            | 728                           | 677                            | 137                           | 289                                           | 11                                 | 28                                | 251                                               |
|                      | 4       | 6933                                       | 11857                                     | 1630                           | 977                           | 1233                           | 186                           | 401                                           | 18                                 | 43                                | 349                                               |
|                      | 5       | 4315                                       | 11857                                     | 1336                           | 955                           | 992                            | 199                           | 348                                           | 11                                 | 50                                | 305                                               |

Comparable SNVs are the variants located in genomic regions where there is at least 10x RNA read coverage in both the single cell and the population. SNVs variants in single cell and/or in population are parts of the comparable SNVs. SNVs consist of novel and dbSNP variants.



**Table S5. Novel RNA variants found in single cells of early human embryos and human embryonic stem cells from Zang et al., 2013 dataset**

| Cell1 and cell2 comparison              | Shared novel variants | Novel variants only in cell1 | Novel variants only in cell2 | % Novel shared in cell1 | % Novel shared in cell2 | % Private variants in cell1 | % Private variants in cell2 |
|-----------------------------------------|-----------------------|------------------------------|------------------------------|-------------------------|-------------------------|-----------------------------|-----------------------------|
| Oocyte1-C1 and Oocyte1-C2               | 2441                  | 721                          | 565                          | 77.20%                  | 81.20%                  | 22.80%                      | 18.80%                      |
| Oocyte1-C1 and Oocyte1-C3               | 2277                  | 672                          | 472                          | 77.21%                  | 82.83%                  | 22.79%                      | 17.17%                      |
| Oocyte1-C2 and Oocyte1-C3               | 2289                  | 566                          | 493                          | 80.18%                  | 82.28%                  | 19.82%                      | 17.72%                      |
| 2-cell-embryo1-C1 and 2-cell-embryo2-C1 | 2455                  | 732                          | 827                          | 77.03%                  | 74.80%                  | 22.97%                      | 25.20%                      |
| 2-cell-embryo1-C1 and 2-cell-embryo2-C2 | 2580                  | 740                          | 953                          | 77.71%                  | 73.03%                  | 22.29%                      | 26.97%                      |
| 2-cell-embryo1-C1 and 2-cell-embryo3-C1 | 2290                  | 813                          | 1006                         | 73.80%                  | 69.48%                  | 26.20%                      | 30.52%                      |
| 2-cell-embryo2-C1 and 2-cell-embryo2-C2 | 2546                  | 821                          | 934                          | 75.62%                  | 73.16%                  | 24.38%                      | 26.84%                      |
| 2-cell-embryo2-C1 and 2-cell-embryo3-C1 | 2242                  | 888                          | 1000                         | 71.63%                  | 69.15%                  | 28.37%                      | 30.85%                      |
| 2-cell-embryo2-C2 and 2-cell-embryo3-C1 | 2323                  | 1012                         | 997                          | 69.66%                  | 69.97%                  | 30.34%                      | 30.03%                      |
| 4-cellembryo1-C1 and 4-cellembryo1-C2   | 2747                  | 3548                         | 3833                         | 43.64%                  | 41.75%                  | 56.36%                      | 58.25%                      |
| 4-cellembryo1-C1 and 4-cellembryo1-C4   | 2406                  | 3088                         | 3274                         | 43.79%                  | 42.36%                  | 56.21%                      | 57.64%                      |
| 4-cellembryo1-C2 and 4-cellembryo1-C4   | 2304                  | 3287                         | 3075                         | 41.21%                  | 42.83%                  | 58.79%                      | 57.17%                      |
| 4-cellembryo2-C1 and 4-cellembryo2-C1   | 2396                  | 2759                         | 2472                         | 46.48%                  | 49.22%                  | 53.52%                      | 50.78%                      |
| 4-cellembryo2-C1 and 4-cellembryo2-C3   | 2395                  | 2862                         | 1524                         | 45.56%                  | 61.11%                  | 54.44%                      | 38.89%                      |
| 4-cellembryo2-C1 and 4-cellembryo2-C4   | 2439                  | 2906                         | 2552                         | 45.63%                  | 48.87%                  | 54.37%                      | 51.13%                      |
| 4-cellembryo2-C2 and 4-cellembryo2-C3   | 2317                  | 2634                         | 1627                         | 46.80%                  | 58.75%                  | 53.20%                      | 41.25%                      |
| 4-cellembryo2-C2 and 4-cellembryo2-C4   | 2446                  | 2791                         | 2812                         | 46.71%                  | 46.52%                  | 53.29%                      | 53.48%                      |
| 4-cellembryo2-C3 and 4-cellembryo2-C4   | 2373                  | 1708                         | 2792                         | 58.15%                  | 45.94%                  | 41.85%                      | 54.06%                      |
| 4-cellembryo3-C1 and 4-cellembryo3-C2   | 2555                  | 1713                         | 2895                         | 59.86%                  | 46.88%                  | 40.14%                      | 53.12%                      |
| 4-cellembryo3-C1 and 4-cellembryo3-C3   | 2370                  | 1572                         | 1514                         | 60.12%                  | 61.02%                  | 39.88%                      | 38.98%                      |
| 4-cellembryo3-C1 and 4-cellembryo3-C4   | 2663                  | 1872                         | 2489                         | 58.72%                  | 51.69%                  | 41.28%                      | 48.31%                      |
| 4-cellembryo3-C2 and 4-cellembryo3-C3   | 2333                  | 2623                         | 1445                         | 47.07%                  | 61.75%                  | 52.93%                      | 38.25%                      |
| 4-cellembryo3-C2 and 4-cellembryo3-C4   | 2598                  | 2961                         | 2390                         | 46.74%                  | 52.09%                  | 53.26%                      | 47.91%                      |
| 4-cellembryo3-C3 and 4-cellembryo3-C4   | 2433                  | 1499                         | 2160                         | 61.88%                  | 52.97%                  | 38.12%                      | 47.03%                      |
| ESCP0-1-C1 and ESCP0-1-C2               | 2656                  | 1271                         | 1469                         | 67.63%                  | 64.39%                  | 32.37%                      | 35.61%                      |

**Table S6. Comparing single cell SNVs frequencies between cell line cells and normal human cells.**

|                                                              | Single cell       | Single-cell RNA variant frequency | Mutation frequency ratio (cell-line vs human oocytes) | Avg. RNA variant frequency | Avg. RNA variant frequency/cell division | Avg.deviation |
|--------------------------------------------------------------|-------------------|-----------------------------------|-------------------------------------------------------|----------------------------|------------------------------------------|---------------|
| MDA-MB-231 cells Paclitaxel-paradigm                         | UNT1              | 4.30E-04                          | 6.1                                                   | 6.27E-04                   |                                          | 1.55E-04      |
|                                                              | UNT2              | 9.51E-04                          | 13.6                                                  |                            |                                          |               |
|                                                              | UNT3              | 6.12E-04                          | 8.7                                                   |                            |                                          |               |
|                                                              | UNT4              | 6.80E-04                          | 9.8                                                   |                            |                                          |               |
|                                                              | UNT5              | 4.52E-04                          | 6.5                                                   |                            |                                          |               |
|                                                              | S1                | 5.96E-04                          | 8.5                                                   | 8.52E-04                   |                                          | 1.99E-04      |
|                                                              | S2                | 7.94E-04                          | 11.3                                                  |                            |                                          |               |
|                                                              | S3                | 7.74E-04                          | 11.1                                                  |                            |                                          |               |
|                                                              | S4                | 7.82E-04                          | 11.2                                                  |                            |                                          |               |
|                                                              | S5                | 1.31E-03                          | 18.8                                                  |                            |                                          |               |
|                                                              | DT1               | 4.14E-04                          | 5.9                                                   | 4.7E-04                    | 7.8E-05                                  | 7.2E-05       |
|                                                              | DT2               | 3.58E-04                          | 5.1                                                   |                            |                                          |               |
|                                                              | DT3               | 4.50E-04                          | 6.4                                                   |                            |                                          |               |
|                                                              | DT4               | 5.97E-04                          | 8.5                                                   |                            |                                          |               |
|                                                              | DT5               | 5.19E-04                          | 7.4                                                   |                            |                                          |               |
| Early human embryos (Ref: Yan et al. 2013)                   | Oocyte1-C1        | 1.23E-04                          | 1.8                                                   | 7.0E-05                    |                                          | 1.39E-05      |
|                                                              | Oocyte1-C2        | 9.37E-05                          | 1.3                                                   |                            |                                          |               |
|                                                              | Oocyte1-C3        | 8.95E-05                          | 1.3                                                   |                            |                                          |               |
|                                                              | 2-cell-embryo1-C1 | 1.24E-04                          | 1.8                                                   | 1.4E-04                    | 1.4E-04                                  |               |
|                                                              | 2-cell-embryo1-C2 | 1.39E-04                          | 2.0                                                   |                            |                                          |               |
|                                                              | 2-cell-embryo2-C1 | 1.36E-04                          | 1.9                                                   |                            |                                          |               |
|                                                              | 2-cell-embryo2-C2 | 1.42E-04                          | 2.0                                                   |                            |                                          |               |
|                                                              | 2-cell-embryo3-C1 | 1.42E-04                          | 2.0                                                   |                            |                                          |               |
|                                                              | 2-cell-embryo3-C2 | 1.58E-04                          | 2.3                                                   |                            |                                          |               |
|                                                              | 4-cell-embryo2-C1 | 6.91E-04                          | 9.9                                                   | 4.7E-04                    | 2.4E-04                                  | 1.2E-04       |
|                                                              | 4-cell-embryo2-C2 | 5.66E-04                          | 8.1                                                   |                            |                                          |               |
|                                                              | 4-cell-embryo2-C3 | 2.48E-04                          | 3.5                                                   |                            |                                          |               |
|                                                              | 4-cell-embryo2-C4 | 4.60E-04                          | 6.6                                                   |                            |                                          |               |
|                                                              | 4-cell-embryo3-C1 | 3.28E-04                          | 4.7                                                   |                            |                                          |               |
|                                                              | 4-cell-embryo3-C2 | 6.34E-04                          | 9.1                                                   |                            |                                          |               |
|                                                              | 4-cell-embryo3-C3 | 3.72E-04                          | 5.3                                                   |                            |                                          |               |
|                                                              | 4-cell-embryo3-C4 | 4.98E-04                          | 7.1                                                   |                            |                                          |               |
|                                                              | ESCP0-1-C1        | 4.96E-04                          | 7.1                                                   | 5.2E-04                    |                                          |               |
| ESCP0-1-C2                                                   | 5.54E-04          | 7.9                               |                                                       |                            |                                          |               |
| Human ES cells and cancer cells (Ref: Ramsköld et. al. 2012) | ESC1              | 3.47E-04                          | 5.0                                                   | 3.3E-04                    |                                          |               |
|                                                              | ESC2              | 3.33E-04                          | 4.8                                                   |                            |                                          |               |
|                                                              | ESC3              | 2.58E-04                          | 3.7                                                   |                            |                                          |               |
|                                                              | ESC4              | 3.66E-04                          | 5.2                                                   |                            |                                          |               |
|                                                              | ESC5              | 2.79E-04                          | 4.0                                                   |                            |                                          |               |
|                                                              | ESC6              | 3.52E-04                          | 5.0                                                   |                            |                                          |               |
|                                                              | ESC7              | 2.50E-04                          | 3.6                                                   |                            |                                          |               |
|                                                              | ESC8              | 4.77E-04                          | 6.8                                                   |                            |                                          |               |
|                                                              | SKMEL5 cell1      | 8.84E-04                          | 12.6                                                  | 7.0E-04                    |                                          |               |
|                                                              | SKMEL5 cell2      | 7.77E-04                          | 11.1                                                  |                            |                                          |               |
|                                                              | SKMEL5 cell3      | 6.30E-04                          | 9.0                                                   |                            |                                          |               |
|                                                              | SKMEL5 cell4      | 9.47E-04                          | 13.5                                                  |                            |                                          |               |
|                                                              | UACC257 cell1     | 5.42E-04                          | 7.7                                                   |                            |                                          |               |
| UACC257 cell2                                                | 5.11E-04          | 7.3                               |                                                       |                            |                                          |               |
| UACC257 cell3                                                | 6.10E-04          | 8.7                               |                                                       |                            |                                          |               |

**Table S7: SNV validation using pyrosequencing. Related to Figure 3.**

| Locus          | Cells                                                   | HiSeq variant calls | Pyrosequencing results |
|----------------|---------------------------------------------------------|---------------------|------------------------|
| chr17:33478229 | DT-cell #4<br>DT-cell #9B.1<br>DT-cell #9B.2            | A-to-T              | A-to-T                 |
| chr3:170078232 | DT-cell #1<br>DT-cell #2<br>DT-cell #3<br>DT-cell #9B.2 | G-to-A              | G-to-A                 |
| chr17:6917703  | DT-cell #1<br>DT-cell #2<br>DT-cell #9B.2               | G-to-A              | G-to-A                 |
| chr10:27459670 | DT-cell #1<br>DT-cell #9B.1                             | C-to-T              | C-to-T                 |
| chr13:76378459 | S-cell #1<br>S-cell #2<br>DT-cell #3.1                  | T-to-C              | T-to-C                 |
| chr16:2815237  | DT-cell #2<br>DT-cell #4<br>DT-cell #9B.2               | T-to-G              | T-to-G                 |
| chr3:196612295 | DT-cell #1<br>DT-cell #9B.1                             | G-to-T              | G-to-T                 |
| chr3:196769982 | S-cell #1<br>S-cell #2<br>S-cell #3<br>DT-cell #3.1     | G-to-C              | G-to-C                 |
| chr16:33963248 | UNT-cell #4<br>UNT-cell #5<br>UNT-cell #6               | T-to-C              | T-to-C                 |
| chr9:33625096  | UNT-cell #3<br>UNT-cell #6                              | T-to-C              | T-to-C                 |

The variant calls are made by using the Allele Quantification (AQ) Pyrosequencing Assay in the PyroMark Q24 1.010 software.

**Table S8. RNA variants found in at least three out of five drug-tolerant single cells that were not present in untreated or stressed single cells. Related to Figure 3.**

| <b>Locus</b>    | <b>Gene affected</b>  | <b>Mutation type</b> |
|-----------------|-----------------------|----------------------|
| chr1:54232975   | <i>TMEM48</i>         | 3'-UTR               |
| chr1:54269670   | <i>TMEM48</i>         | Missense             |
| chr2:128744486  | <i>SAPI30</i>         | Missense             |
| chr2:141816502  | <i>LRP1B</i>          | Missense             |
| chr2:166626700  | <i>GALNT3</i>         | Missense             |
| chr2:173916571  | <i>RAPGEF4</i>        | Missense             |
| chr2:55201845   | <i>RTN4</i>           | Missense             |
| chr2:55200973   | <i>RTN4</i>           | Missense             |
| chr2:55200710   | <i>RTN4</i>           | Missense             |
| chr3:45007193   | <i>ZDHHC3</i>         | Intron               |
| chr3:63601583   | <i>SYNPR</i>          | 3'-UTR               |
| chr3:185211018  | <i>ZDHHC3</i>         | Missense             |
| chr4:27010057   | <i>STIM2</i>          | Misense              |
| chr5:139908435  | <i>ANKHD1</i>         | Missense             |
| chr6:7882933    | <i>MUTED / TXNDC5</i> | Missense / Silent    |
| chr6:8015778    | <i>MUTED / TXNDC5</i> | Missense / Silent    |
| chr6:76412735   | <i>SENP6</i>          | Missense             |
| chr6:122734789  | <i>HSF2</i>           | Missense             |
| chr7:44425714   | <i>NUDCD3</i>         | Missense             |
| chr7:93592725   | <i>BET1</i>           | 3'-UTR               |
| chr7:115894125  | <i>TES</i>            | Intron               |
| chr7:138822678  | <i>TTC26</i>          | Missense             |
| chr8:17885150   | <i>PCMI</i>           | Missense             |
| chr9:95068105   | <i>NOL8</i>           | Missense             |
| chr9:95072953   | <i>NOL8</i>           | Misense              |
| chr9:123555243  | <i>FBXW2</i>          | Missense             |
| chr10:12199974  | <i>SEC61A2</i>        | Missense             |
| chr10:71977528  | <i>PPA1</i>           | Intron               |
| chr11:83182669  | <i>DLG2</i>           | Missense             |
| chr11:94607183  | <i>AMOTL1</i>         | 3'-UTR               |
| chr12:27542113  | <i>ARNTL2</i>         | Missense             |
| chr12:42792740  | <i>PPHLN1</i>         | Stop Lost            |
| chr12:69743928  | <i>LYZ</i>            | Silent               |
| chr13:21044267  | <i>CRYL1</i>          | Intron               |
| chr15:89021827  | <i>MRPS11</i>         | 3'-UTR               |
| chr17:64208161  | <i>APOH</i>           | 3'-UTR               |
| chr:19:46253959 | AC074212.3            | Silent               |
| chr22:25592835  | <i>KIAA1671</i>       | 3'-UTR               |

There are 38 novel RNA variants that are unique to the drug-tolerant single cells and are not present in dbSNP.

**Table S9. Average depth of read coverage of genes associated with Paclitaxel-resistance**

| <b>UNTREATED CELLS</b>     |              |              |              |              |              |
|----------------------------|--------------|--------------|--------------|--------------|--------------|
| <b>GENES</b>               | <b>UNT_1</b> | <b>UNT_2</b> | <b>UNT_3</b> | <b>UNT_4</b> | <b>UNT_5</b> |
| RAPGEF4                    | 117          | 94           | 7            | 16           | 52           |
| ABCC2                      | 2            | 5            | 2            | 16           | 1            |
| TOP2A                      | 60           | 59           | 154          | 9            | 275          |
| BCL2                       | 0            | 1            | 0            | 0            | 10           |
| TUBB4                      | 9            | 401          | 0            | 11           | 56           |
| BAX                        | 69           | 1            | 0            | 1            | 57           |
| BCL2L1                     | 1244         | 19           | 0            | 15           | 42           |
| TOP2B                      | 12           | 145          | 50           | 27           | 41           |
| ABCG2                      | 2            | 2            | 1            | 3            | 2            |
| TUBB2C                     | 379          | 334          | 261          | 635          | 675          |
| RB1                        | 1            | 11           | 1            | 28           | 2            |
| TUBB3                      | 14           | 3            | 0            | 19           | 33           |
| TP53                       | 2            | 1            | 0            | 1            | 4            |
| TOP1                       | 15           | 22           | 2            | 1            | 8            |
| TUBB2A                     | 10           | 6            | 0            | 11           | 50           |
| EGFR                       | 1            | 77           | 1            | 7            | 20           |
| MED12                      | 2            | 6            | 5            | 78           | 2            |
| <b>STRESSED CELLS</b>      |              |              |              |              |              |
| <b>GENES</b>               | <b>S_1</b>   | <b>S_2</b>   | <b>S_3</b>   | <b>S_4</b>   | <b>S_5</b>   |
| RAPGEF                     | 19           | 60           | 6            | 39           | 95           |
| ABCC2                      | 1            | 2            | 17           | 1            | 1            |
| TOP2A                      | 43           | 1            | 56           | 11           | 40           |
| BCL2                       | 2            | 2            | 14           | 0            | 1            |
| TUBB4                      | 26           | 16           | 8            | 8            | 66           |
| BAX                        | 10           | 22           | 13           | 2            | 1426         |
| BCL2L1                     | 21           | 83           | 52           | 1            | 110          |
| TOP2B                      | 26           | 37           | 14           | 1            | 67           |
| ABCG2                      | 6            | 1            | 1            | 1            | 1            |
| TUBB2C                     | 353          | 411          | 126          | 333          | 467          |
| RB1                        | 4            | 1            | 2            | 2            | 1            |
| TUBB3                      | 24           | 19           | 8            | 26           | 81           |
| TP53                       | 4            | 7            | 1            | 17           | 2            |
| TOP1                       | 10           | 15           | 17           | 8            | 81           |
| TUBB2A                     | 69           | 236          | 11           | 19           | 52           |
| EGFR                       | 17           | 21           | 14           | 1            | 127          |
| MED12                      | 16           | 26           | 4            | 7            | 256          |
| <b>DRUG-TOLERANT CELLS</b> |              |              |              |              |              |
| <b>GENES</b>               | <b>DT_1</b>  | <b>DT_2</b>  | <b>DT_3</b>  | <b>DT_4</b>  | <b>DT_5</b>  |
| RAPGEF4                    | 60           | 58           | 102          | 75           | 31           |
| ABCC2                      | 2            | 2            | 1            | 1            | 1            |
| TOP2A                      | 258          | 221          | 110          | 941          | 258          |
| BCL2                       | 0            | 0            | 0            | 0            | 0            |
| TUBB4                      | 3            | 29           | 32           | 32           | 2            |
| BAX                        | 2            | 6            | 1            | 1            | 82           |
| BCL2L1                     | 16           | 38           | 4            | 44           | 3            |
| TOP2B                      | 32           | 65           | 22           | 603          | 157          |
| ABCG2                      | 1            | 0            | 1            | 1            | 1            |
| TUBB2C                     | 400          | 1008         | 1244         | 1592         | 250          |
| RB1                        | 10           | 14           | 35           | 152          | 20           |
| TUBB3                      | 272          | 25           | 0            | 42           | 2            |
| TP53                       | 3            | 4            | 2            | 8            | 1            |
| TOP1                       | 30           | 161          | 33           | 25           | 3            |
| TUBB2A                     | 4            | 36           | 36           | 100          | 5            |
| EGFR                       | 129          | 1            | 1            | 925          | 62           |
| MED12                      | 1            | 4            | 1            | 127          | 10           |

**Table S10: SNV in genes associated with Paclitaxel-resistance.**

|                | Untreated cells                | Stressed cells                                               | Drug-tolerant cells                             |
|----------------|--------------------------------|--------------------------------------------------------------|-------------------------------------------------|
| <b>RAPGEF4</b> | -                              | -                                                            | DT_1 (chr2: 173916571) missense<br>DT_2<br>DT_5 |
| <b>ABCC2</b>   | -                              | -                                                            | -                                               |
| <b>TOP2A</b>   | UNT_5 (chr7:38572727) missense | S_1 (chr7:38548572) missense<br>S_1 (chr7:38556634) missense | DT_1 (chr7: 38569794) missense                  |
| <b>BCL2</b>    | -                              | -                                                            | -                                               |
| <b>TUBB4</b>   | -                              | -                                                            | -                                               |
| <b>BAX</b>     |                                |                                                              | DT_5 (chr19:49459472) missense                  |
| <b>BCL2L1</b>  | -                              | -                                                            | -                                               |
| <b>TOP2B</b>   | -                              | -                                                            | -                                               |
| <b>ABCG2</b>   | -                              | -                                                            | -                                               |
| <b>TUBB2C</b>  | -                              | S_2 (chr9:140137975) missense                                | -                                               |
| <b>RB1</b>     | -                              | -                                                            | -                                               |
| <b>TUBB3</b>   | -                              | -                                                            | -                                               |
| <b>TP53</b>    | -                              | -                                                            | -                                               |
| <b>TOP1</b>    | -                              | -                                                            | DT_4 (chr20:9752843) 3'UTR                      |
| <b>TUBB2A</b>  | -                              | -                                                            | -                                               |
| <b>EGFR</b>    | -                              | -                                                            | DT_5 (chr7:55274798) 3'UTR                      |
| <b>MED12</b>   | -                              | -                                                            | -                                               |
